# Supplementary material for: Knowledge Domain and Emerging Trends on Echinococcosis Research: A Scientometric Analysis
Source: PubMed Central journal article supplement (PMC6427242; doi:10.3390/ijerph16050842), 2019-03-08
Supplement: ijerph-16-00842-s001.pdf [file ijerph-16-00842-s001.pdf]

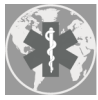

*Communication*

# Knowledge Domain and Emerging Trends on Echinococcosis Research: A Scientometric Analysis

## Supplemental data

**Table S1.** Top 10 countries contributed to publications on echinococcosis research from 1980 to 2017.

| Rank | Country         | Count | Centrality | Percent (%) |
|------|-----------------|-------|------------|-------------|
| 1    | TURKEY          | 1,133 | 0.00       | 14.74%      |
| 2    | FRANCE          | 582   | 0.30       | 7.57%       |
| 3    | PEOPLES R CHINA | 574   | 0.56       | 7.47%       |
| 4    | USA             | 521   | 0.56       | 6.78%       |
| 5    | ENGLAND         | 485   | 0.44       | 6.31%       |
| 6    | GERMANY         | 482   | 0.14       | 6.27%       |
| 7    | SWITZERLAND     | 480   | 0.64       | 6.24%       |
| 8    | INDIA           | 376   | 0.00       | 4.89%       |
| 9    | AUSTRALIA       | 356   | 0.34       | 4.63%       |
| 10   | SPAIN           | 355   | 0.00       | 4.62%       |

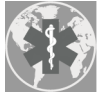

**Table S2.** Top 10 institutions contributed to publications on echinococcosis research from 1980

to 2017.

| Rank | Institution                         | Count | Centrality | Percent (%) |
|------|-------------------------------------|-------|------------|-------------|
| 1    | Univ Zurich (German)                | 229   | 0.14       | 2.98%       |
| 2    | Univ Bern (Switzerland)             | 203   | 0.14       | 2.64%       |
| 3    | Univ Salford (England)              | 173   | 0.23       | 2.25%       |
| 4    | Univ Franche Comte (France)         | 166   | 0.22       | 2.16%       |
| 5    | Xinjiang Med Univ (China)           | 150   | 0.04       | 1.95%       |
| 6    | Univ Republica (Spanish)            | 116   | 0.03       | 1.51%       |
| 7    | Ataturk Univ (Turkish)              | 102   | 0.10       | 1.33%       |
| 8    | Hokkaido Univ (Japan)               | 96    | 0.04       | 1.25%       |
| 9    | Queensland Inst Med Res (Australia) | 79    | 0.03       | 1.03%       |
| 10   | Asahikawa Med Coll (Japan)          | 78    | 0.03       | 1.02%       |

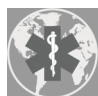

**Table S3.** Top 10 authors of publications and cited authors on echinococcosis research in terms of co-citation counts and centrality from 1980 to 2017.

| Rank | Publications             |       |             | Co-citations    |                    | Centrality |                   |
|------|--------------------------|-------|-------------|-----------------|--------------------|------------|-------------------|
|      | Author/ Country          | Count | Percent (%) | Citation counts | Cited author       | Centrality | Cited author      |
| 1    | Craig PS/ UK             | 171   | 2.22%       | 1508            | Eckert J, 1980     | 0.54       | Beard TC, 1980    |
| 2    | Gottstein B/ Switzerland | 167   | 2.17%       | 907             | Thompson RCA, 1982 | 0.54       | Nelson GS, 1981   |
| 3    | Wen H/ China             | 126   | 1.64%       | 787             | Craig PS, 1984     | 0.49       | Eckert J, 1980    |
| 4    | Vuitton DA/ France       | 123   | 1.60%       | 783             | Mcmanus DP, 1982   | 0.39       | Schwabe CW, 1982  |
| 5    | Ito A/ Japan             | 120   | 1.56%       | 751             | Gottstein B, 1984  | 0.36       | Kern P, 1980      |
| 6    | Deplazes P/ Switzerland  | 113   | 1.47%       | 661             | Schantz PM, 1980   | 0.36       | Purriel P, 1983   |
| 7    | Mcmanus DP/ Australia    | 109   | 1.42%       | 587             | Vuitton DA, 1988   | 0.33       | Mcmanus DP, 1982  |
| 8    | Kern P/ Germany          | 94    | 1.22%       | 486             | Deplazes P, 1994   | 0.31       | Gemmell MA, 1980  |
| 9    | Lightowers MW/ Australia | 79    | 1.03%       | 462             | Torgerson PR, 2003 | 0.30       | Verster AJM, 1982 |
| 10   | Giraudoux P/ France      | 77    | 1.00%       | 421             | Rausch RL, 1980    | 0.29       | Farag H, 1980     |

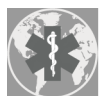

**Table S4.** Top 10 journals of publications and cited journals on echinococcosis research in terms of co-citations counts and centrality from 1980 to 2017.

| Rank | Publications         |       |             | Co-citations    |                      | Centrality |                      |
|------|----------------------|-------|-------------|-----------------|----------------------|------------|----------------------|
|      | Journals             | Count | Percent (%) | Citation counts | Cited journal        | Centrality | Cited journal        |
| 1    | Vet Parasitol        | 260   | 3.38%       | 2245            | Parasitology         | 0.78       | Nature               |
| 2    | Parasitol Res        | 250   | 3.25%       | 2202            | Int J Parasitol      | 0.71       | Clin Exp Immunol     |
| 3    | Parasitology         | 180   | 2.34%       | 2201            | Am J Trop Med Hyg    | 0.71       | Immunology           |
| 4    | Acta Trop            | 161   | 2.09%       | 1846            | Acta Trop            | 0.71       | Tropenmed Parasitol  |
| 5    | Am J Trop Med Hyg    | 147   | 1.91%       | 1593            | Parasitol Res        | 0.69       | J Exp Med            |
| 6    | Int J Parasitol      | 145   | 1.89%       | 1561            | Vet Parasitol        | 0.67       | Acta Trop            |
| 7    | J Helminthol         | 125   | 1.63%       | 1415            | T Roy Soc Trop Med H | 0.66       | Int J Parasitol      |
| 8    | Ann Trop Med Parasit | 124   | 1.61%       | 1409            | Ann Trop Med Parasit | 0.65       | Brit Med J           |
| 9    | Parasitol Int        | 105   | 1.37%       | 1257            | J Parasitol          | 0.65       | Acta Gastro-Ent Belg |
| 10   | Parasite Immunol     | 104   | 1.35%       | 2245            | Mol Biochem Parasit  | 0.64       | Med J Australia      |

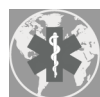

**Table S5.** Top 10 co-cited references related to echinococcosis research from 1980 to 2017.

| Rank | Co-citation counts | Centrality | Cited reference                                                                                       | Author/publication year/ journal                                    |
|------|--------------------|------------|-------------------------------------------------------------------------------------------------------|---------------------------------------------------------------------|
| 1    | 264                | 0.02       | Expert consensus for the diagnosis and treatment of cystic and alveolar echinococcosis in humans      | Brunetti E, 2010, <i>Acta Trop</i> (Brunetti et al. 2010)           |
| 2    | 255                | 0.03       | Biological, epidemiological, and clinical aspects of echinococcosis, a zoonosis of increasing concern | Eckert J, 2004, <i>Clin Microbiol Rev</i> (Eckert et al. 2004)      |
| 3    | 130                | 0.02       | A molecular phylogeny of the genus <i>Echinococcus</i> inferred from complete mitochondrial genomes   | Nakao M, 2007, <i>Parasitology</i> (Nakao et al. 2007)              |
| 4    | 128                | 0.05       | The taxonomy, phylogeny and transmission of <i>Echinococcus</i>                                       | Thompson RCA, 2008, <i>Exp Parasitol</i> (Thompson 2008)            |
| 5    | 121                | 0.05       | Global socioeconomic impact of cystic echinococcosis                                                  | Budke CM, 2006, <i>Emerg Infect Dis</i> (Budke et al. 2006)         |
| 6    | 105                | 0.01       | Guidelines for treatment of cystic and alveolar echinococcosis in humans                              | Vuitton DA, 1996, <i>B World Health Organ</i> (Vuitton et al. 1996) |
| 7    | 105                | 0.12       | Prevention and control of cystic echinococcosis                                                       | Craig PS, 2007, <i>Lancet Infect Dis</i> (Craig et al. 2007)        |
| 8    | 88                 | 0.06       | Human alveolar echinococcosis after fox population increase                                           | Schweiger A, 2007, <i>Emerg Infect Dis</i> (Schweiger et al. 2007)  |
| 9    | 77                 | 0.04       | European echinococcosis registry: human alveolar echinococcosis, Europe, 1982-2000                    | Kern P, 2003, <i>Emerg Infect Dis</i> (Kern et al. 2003)            |
| 10   | 72                 | 0.17       | Percutaneous drainage compared with surgery for hepatic hydatid cysts                                 | Khuroo MS, 1997, <i>New Engl J Med</i> (Khuroo et al. 1997)         |



**Table S6.** The 6 top-ranked clusters in the echinococcosis field from 1980 to 2017.

| Cluster ID | Size | Silhouette | Mean<br>(cite year) | Label (TFIDF)               | Label (LLR)                       | Label (MI)                     |
|------------|------|------------|---------------------|-----------------------------|-----------------------------------|--------------------------------|
| #0         | 83   | 0.909      | 2008                | echinococcus granulosus     | cystic echinococcosis             | tomographic diagnosis          |
| #1         | 78   | 0.897      | 1995                | liver                       | percutaneous treatment            | comparative proteome profiling |
| #2         | 72   | 0.872      | 2001                | echinococcus multilocularis | echinococcus multilocularis       | hydatid fluid                  |
| #3         | 68   | 0.909      | 1978                | mebendazole                 | infected sheep                    | Algerian patient               |
| #4         | 58   | 0.793      | 1993                | alveolar echinococcosis     | pulmonary alveolar echinococcosis | major cyst fluid antigen       |
| #5         | 54   | 0.857      | 1984                | hydatid-disease             | current management                | liver echinococcosis           |

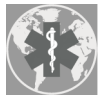

**Table S7.** Top 10 keywords of publications on echinococcosis research in terms of citation counts and centrality.

| Rank | Citation counts |                            | Centrality |                            |
|------|-----------------|----------------------------|------------|----------------------------|
|      | Counts          | Keyword                    | Centrality | Keyword                    |
| 1    | 1120            | Echinococcus granulosus    | 0.30       | Echinococcus granulosus    |
| 2    | 991             | Hydatid cyst               | 0.14       | Alveolar echinococcosis    |
| 3    | 761             | Liver                      | 0.14       | Epidemiology               |
| 4    | 695             | Diagnosis                  | 0.11       | Albendazole                |
| 5    | 660             | Cystic echinococcosis      | 0.1        | Prevalence                 |
| 6    | 619             | Echinococcus multiloculari | 0.1        | Diagnosis                  |
| 7    | 574             | Cyst                       | 0.1        | Albendazole                |
| 8    | 550             | Alveolar echinococcosis    | 0.09       | Echinococcus multiloculari |
| 9    | 510             | Albendazole                | 0.08       | Cystic echinococcosis      |
| 10   | 400             | Prevalence                 | 0.08       | Liver                      |

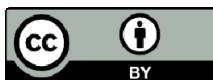

© 2019 by the authors. Submitted for possible open access publication under the terms and conditions of the Creative Commons Attribution (CC BY) license (<http://creativecommons.org/licenses/by/4.0/>).
